# Supplementary material
Source: Springer Nature journal article supplement (https://www.springermedizin.de/resource/supplementary/13041_2014_288_MOESM2_ESM.pdf/25657918)

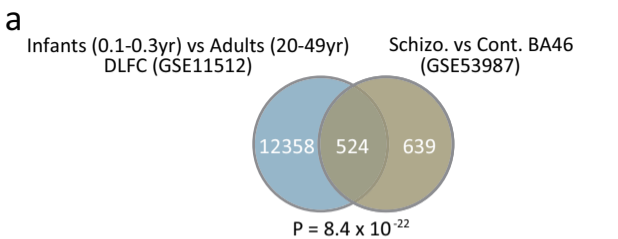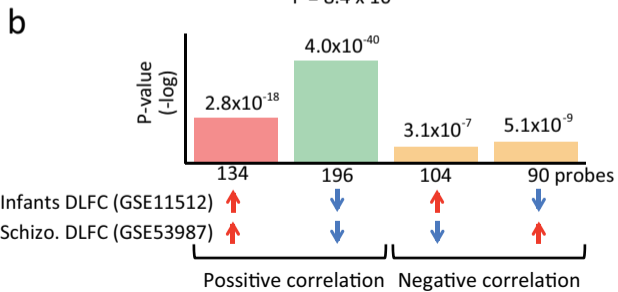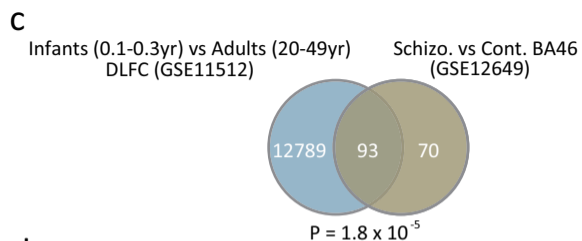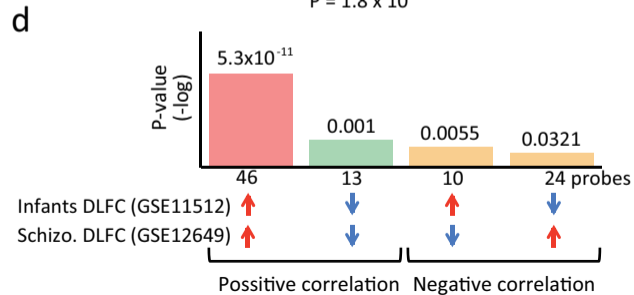

Supplement: MOESM2 [file 25657918]
